# Supplementary material for: Morphology-controlled two-dimensional elliptical hemisphere arrays fabricated by a colloidal crystal based micromolding method
Source: Royal Society of Chemistry journal article supplement (doi:10.1039/b915205a), 2009-10-14
Supplement: b915205a.pdf [file b915205a.pdf]

# Morphology-Controlled Two-Dimensional Elliptical Hemisphere Arrays Fabricated by Colloidal Crystal Based Micromolding Method

Tieqiang Wang<sup>a</sup>, Xiao Li<sup>a</sup>, Junhu Zhang<sup>a\*</sup>, Zhiyu Ren<sup>b</sup>, Xuemin Zhang<sup>a</sup>, Xun Zhang<sup>a</sup>,

Difu Zhu<sup>a</sup>, Fang Han<sup>a</sup>, Xianzhe Wang<sup>a</sup> and Bai Yang<sup>a</sup>

*a State Key Laboratory of Supramolecular Structure and Materials, College of  
Chemistry, Jilin University, Changchun 130012, P. R. China;*

*b Key Laboratory of Functional Inorganic Material Chemistry, Ministry of Education,  
Laboratory of Physical Chemistry, School of Chemistry and Materials Science,  
Heilongjiang University, Harbin 150080, P. R. of China*

*\* Corresponding author. E-mail: zjh@jlu.edu.cn*

**Electronic Supporting information**

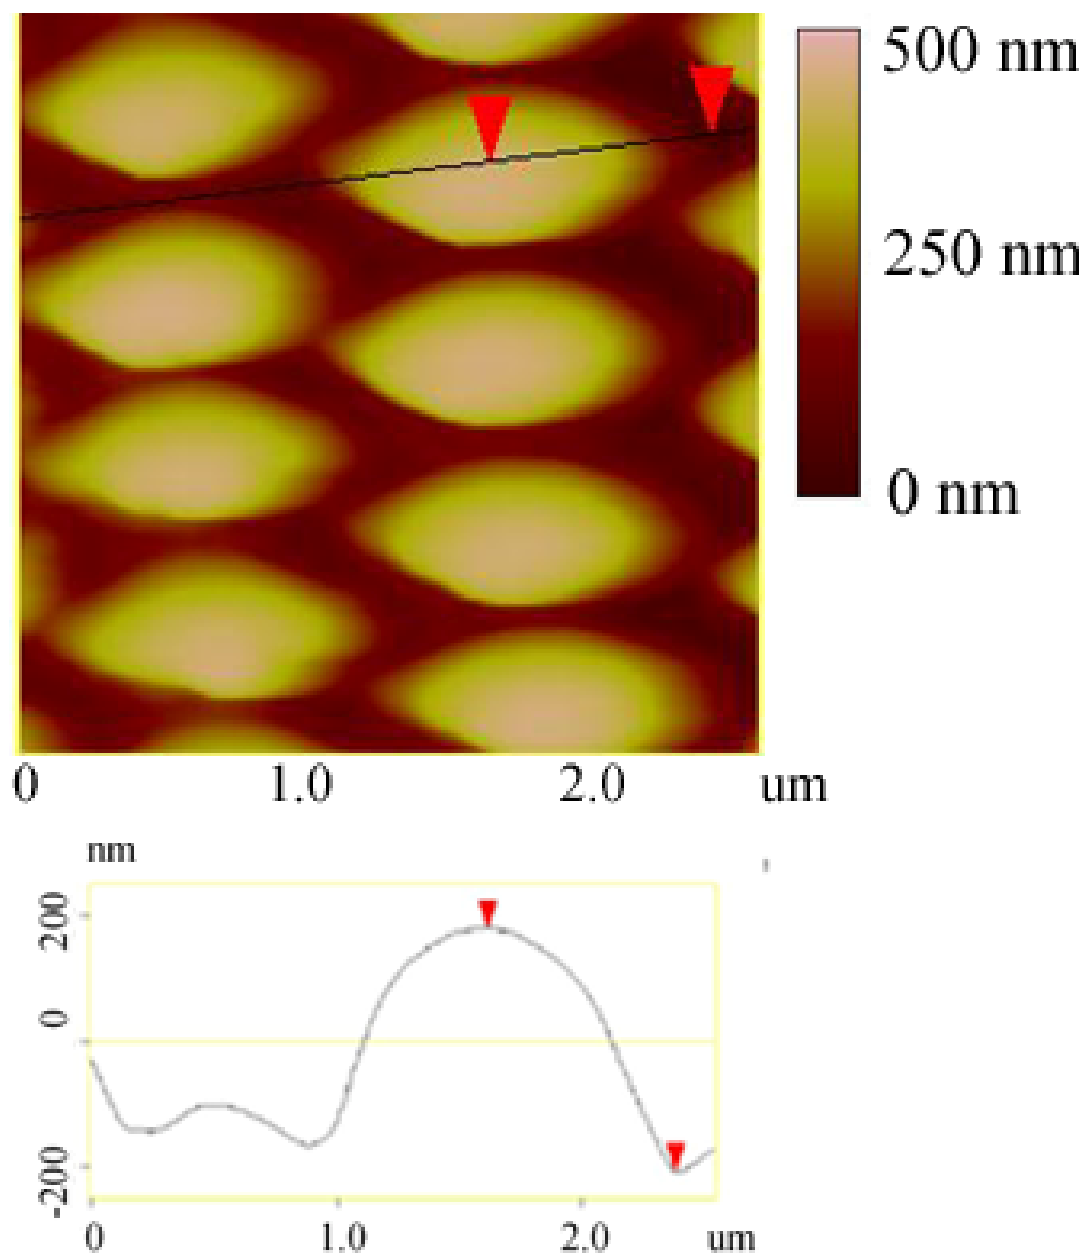

**Figure S1.** AFM images (left) and line profile (right) of the obtained 2D EHA of PS fabricated using the PDMS mold peeled off from the silica spheres template with diameters of 576 nm.

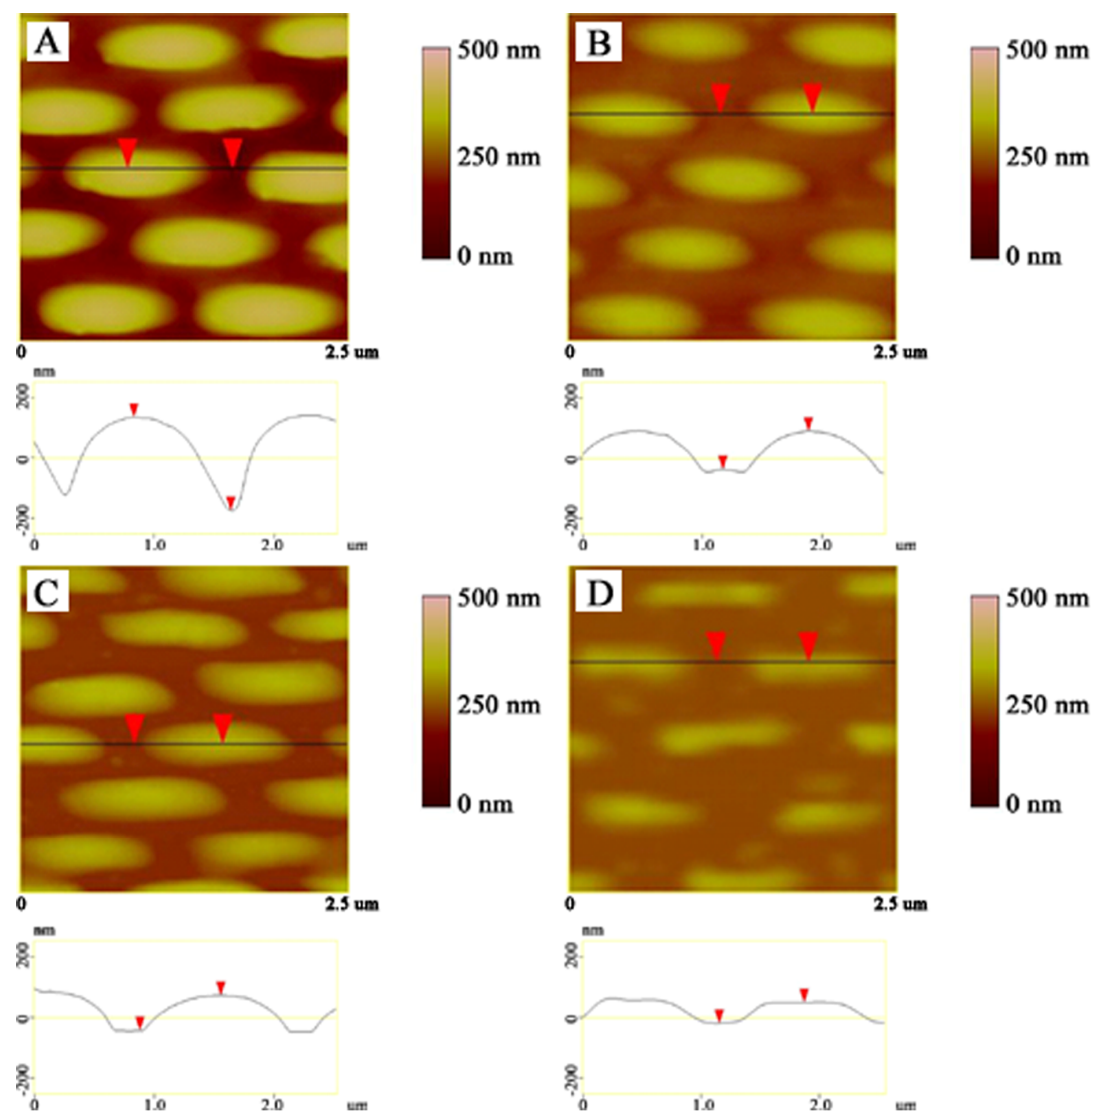

**Figure S2.** AFM images (top) and line profile (down) of the resulted microstructures, the thickness of the PS films is (A) 140 nm, (B) 89 nm, (C) 35 nm and (D) 11 nm, respectively.

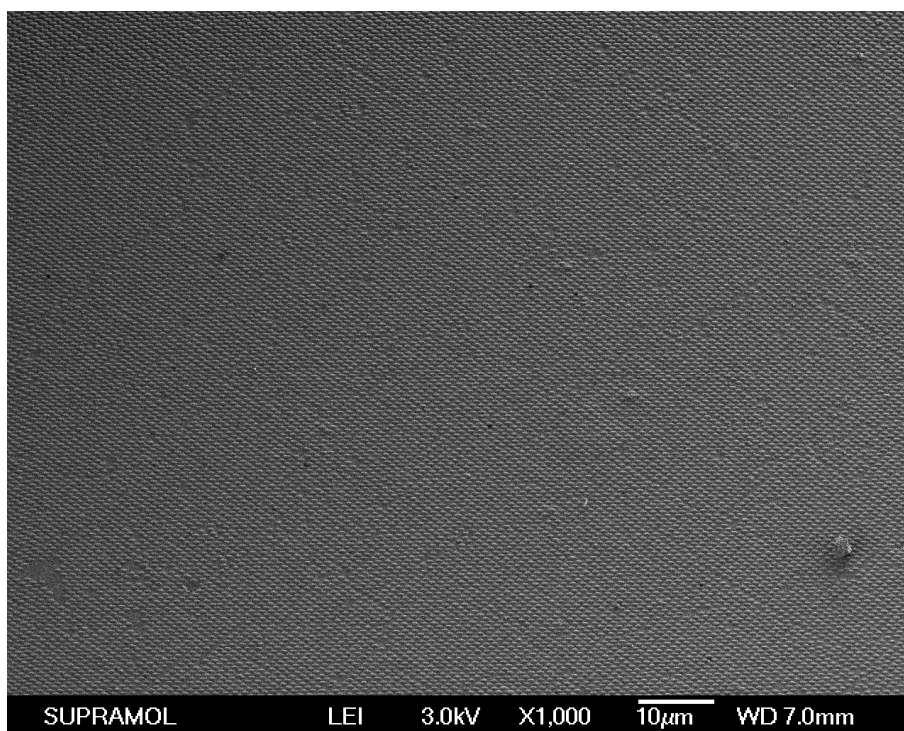

**Figure S3.** SEM images of EHA fabricated stretching along direction I with low magnification.

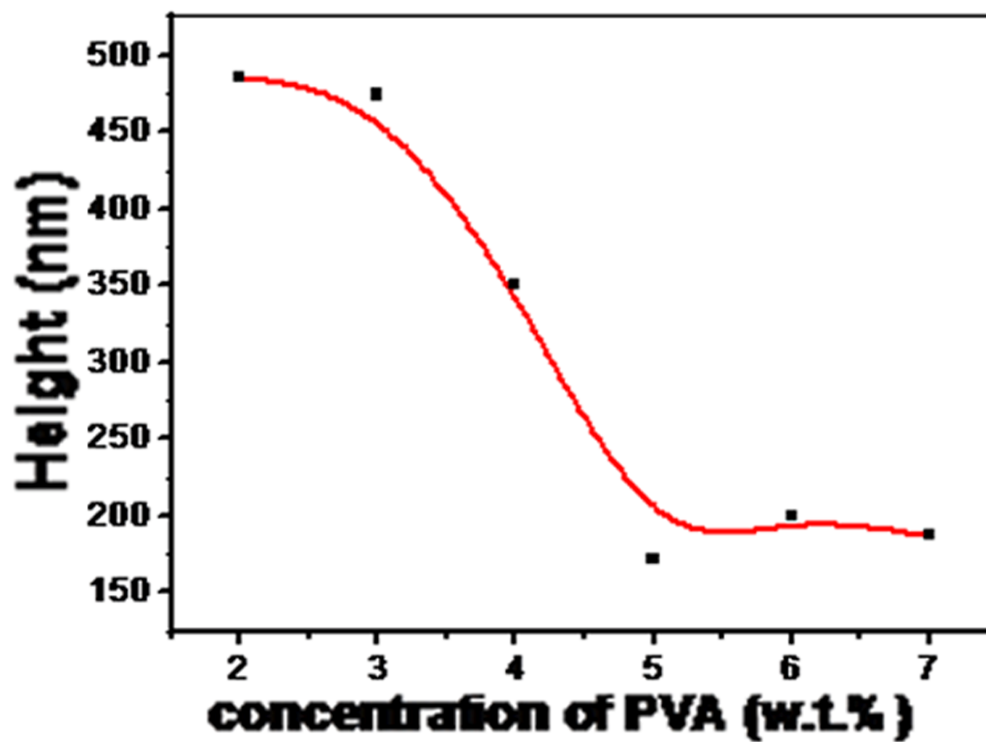

Figure S4. Height of the exposed silica spheres plotted with respect to the concentration of the PVA aqueous solution.

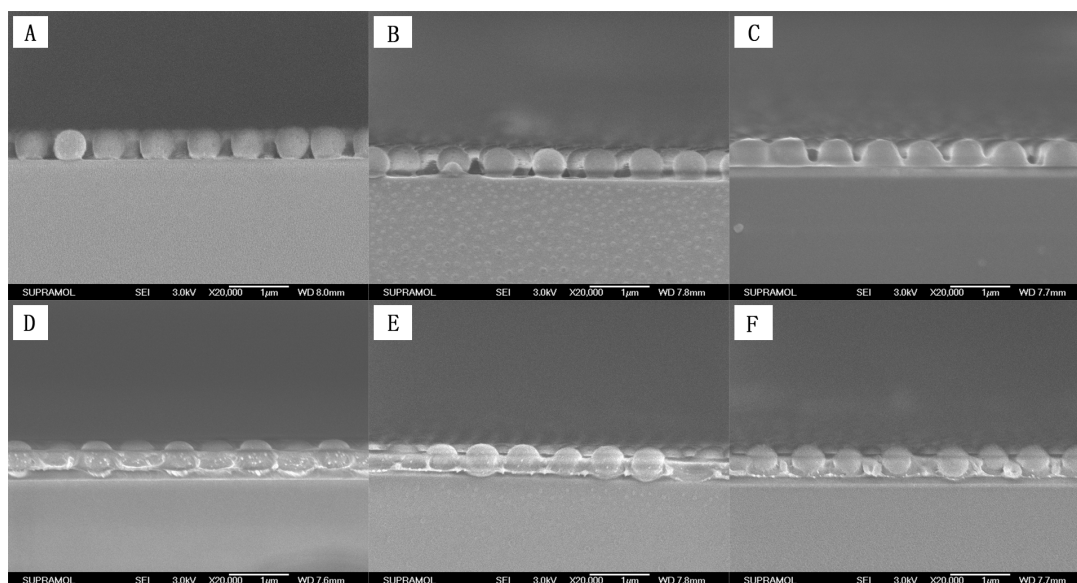

**Figure S5.** Cross section SEM images of the ncp silica arrays sunk into PVA film when using the PVA aqueous solution with the concentration of (A)2 wt. %, (B)3 wt. %, (C)4 wt. %, (D)5 wt. %, (E)6 wt. % and (F)7 wt. %, respectively.
